1     **Application of EGCG modified EDC/NHS cross-linked extracellular**  
2                             **matrix to promote macrophage adhesion**

3                     Chenyu Chu<sup>a,b,#</sup>, Shengan Rung<sup>a,b,#</sup>, Renli Yang<sup>a,b</sup>, Yi Man<sup>a,b\*</sup>, Yili Qu<sup>a,b\*</sup>

4     <sup>a</sup> *State Key Laboratory of Oral Diseases, West China Hospital of Stomatology, Sichuan University,*  
5                                             *Chengdu, Sichuan 610041, China*

6     <sup>b</sup> *Department of Oral Implantology, West China Hospital of Stomatology, Sichuan University,*  
7                                             *Chengdu, Sichuan 610041, China*

8                                             <sup>#</sup>*theses author contributed equally to this work*

9     **Corresponding author:**

10    **Yi Man, DDS, Ph.D**

11    Professor and Chair

12    Department of Oral Implantology

13    State Key Laboratory of Oral Diseases, West China Hospital of Stomatology, Sichuan University,

14    14#, 3rd section, Renmin South Road

15    Chengdu 610041, China

16    Tel: 0086-28-85503571

17    Fax: 0086-28-85483678

18    Email: manyi780203@126.com

19    **Yili Qu, DDS, Ph.D**

20    Associate Professor

21    State Key Laboratory of Oral Diseases, West China Hospital of Stomatology, Sichuan University,

22    14#, 3rd section, Renmin South Road

23    Chengdu 610041, China

24    Tel: 0086-28-85503571

25    E-mail: qqyili@126.com

26

27 **Abstract:** Though chemically cross-linked by EDC/NHS endows collagen membrane  
28 with promising mechanical properties, it is not conducive to modulation of foreign  
29 body reaction (FBR) after implantation or guidance of osteogenesis. In our previous  
30 research, we have found that macrophages have a strong regulatory effect on tissue  
31 and bone regeneration during FBR, and EGCG modified membranes could adjust the  
32 recruitment and phenotypes of macrophages. Accordingly, we develop the  
33 EGCG-EDC/NHS membranes, prepared with physically immersion, while the surface  
34 morphology of the membrane was observed by SEM, the biological activity of  
35 collagen was determined by FTIR, the activity and adhesion of cell culture *in vitro*,  
36 angiogenesis and monocyte/macrophage recruitment after subcutaneous implantation,  
37 etc. are characterized. It could be concluded that EGCG-EDC/NHS collagen  
38 membrane is hopeful to be used in implant dentistry for it not only retains the  
39 advantages of the collagen membrane itself, but also improves cell viability, adhesion  
40 and vascularization tendency. However, the mechanism that lies in the regenerative  
41 advantages of such membrane needs further exploration, but it is certain that the  
42 differences in surface morphology can have a significant impact on the reaction  
43 between the host and the implant, not to mention macrophage in bone regeneration.

44 **Keywords:** collagen membrane; EGCG; adhesion; macrophage; implant dentistry  
45

## 46 **1. Introduction**

47 Guided bone regeneration (GBR) technology takes advantage of barrier membrane to  
48 compartmentalize soft and hard tissue. It protects the hard tissue from an invasion of  
49 the relatively fast-growing soft tissue, thus creates sufficient space and provides  
50 stability for osteogenic cell migration in the meanwhile (Melcher, 1976). Currently,  
51 collagen, the main organic component of extracellular matrix (ECM) and bone, is the  
52 most common resorbable source for membrane fabrication. A meta-analysis revealed  
53 that the survival rate of implant with the application of collagen membrane were close  
54 to 100% both in simultaneous and subsequent implant placement (Wessing, Lettner, &  
55 Zechner, 2018). However, its high biocompatibility also becomes its fatal flaw, which  
56 limits the mechanical properties of the collagen membrane. Without the addition of  
57 crosslinking agents, the integrity of the membrane may not be able to maintain  
58 throughout the entire process of bone regeneration to provide sufficient support  
59 (Meyer, 2019). Although the exposure of membrane is slightly related to the addition  
60 of crosslinker, it is not statistically significant (30%) (Wessing et al., 2018). This  
61 observed degradation time is markedly longer than that of collagen membrane, which  
62 is reported to be completely resorbed 1 to 2 weeks after exposure [18, 34]. The  
63 prolonged degradation time of matrix barrier seems to provide prolonged protecting  
64 of the underlying graft supporting the bone regeneration process. During this healing

65 process, all exposures did resolve within 6-7 weeks and no membrane had to be  
66 extracted. The ridge width gain in both groups was sufficient to allow for the  
67 successful placement of dental implants in all 14 subjects without any complication  
68 (Eskan, Girouard, Morton, & Greenwell, 2017). Therefore, to enhance mechanical  
69 properties with low cytotoxicity and low antigenicity,  
70 1-ethyl-3-(3-dimethylaminopropylcarbodiimide hydrochloride (EDC) in the presence  
71 of N-hydroxy-succinimide (NHS) collagen membrane was selected as our target  
72 (Akhshabi, Biazar, Singh, Keshel, & Geetha, 2018; Bax et al., 2017). Apart from the  
73 degradation rate of membranes, immune environment of the implant site is another  
74 factor that determines the success or failure of the surgery (El-Jawhari, Jones, &  
75 Giannoudis, 2016). Especially in periodontitis, a chronic and degenerative  
76 inflammatory disease which affects approximately 10% of the world's population, the  
77 inflammatory environment makes it harder to conduct tissue engineering with  
78 biomaterials, thus elevates the importance of immune modulation to rebuild balance  
79 (Kurashima & Kiyono, 2017). Epigallocatechin-3-gallate (EGCG) as one of the main  
80 polyphenols in tea could serve as a crosslinker for scaffolds (Honda et al., 2018),  
81 showing bioactive effects in various aspects, especially in dental restoration (Liao et  
82 al., 2020). Compared with pure collagen membrane, its anti-inflammatory (Lagha &  
83 Grenier, 2019; Wu, Choi, Kang, Kim, & Shin, 2017), anti-fibrosis (Wang, Yang, Yuan,

84 Yang, & Zhao, 2018), pro-osteogenic (Lin et al., 2018), macrophage phenotypes  
85 regulatory (Chu et al., 2019) effects are all prompt to rescue the pro-long  
86 inflammation and help the establishment of ideal microenvironment to provide  
87 promising signal in regeneration (Chu et al., 2020). Considering its promising traits,  
88 EGCG was cross-linked to attach the commercial EDC/NHS collagen, and the  
89 modification of EGCG was adjusted at 0.064% w/v, where it is reported to possess  
90 appropriate mechanical properties, anti-inflammatory effects, and cell viability  
91 promotion in previous report (Chu et al., 2016). To ensure that the developed EGCG  
92 modified EDC/NHS collagen membrane meets the need of GBR, its physical,  
93 chemical and biological properties was characterized by means of investigation on  
94 surface morphology, FTIR spectra, DSC statistics, *in vitro* cell viability and integrin  
95 expression, and *in vivo* vascularization and monocyte/ macrophage recruitment. The  
96 aim of this study is to fabricate 0.064% EGCG EDC/NHS collagen membranes (**Fig.**  
97 **1**) with the improvement of cell viability and adhesion, as well as revascularization.

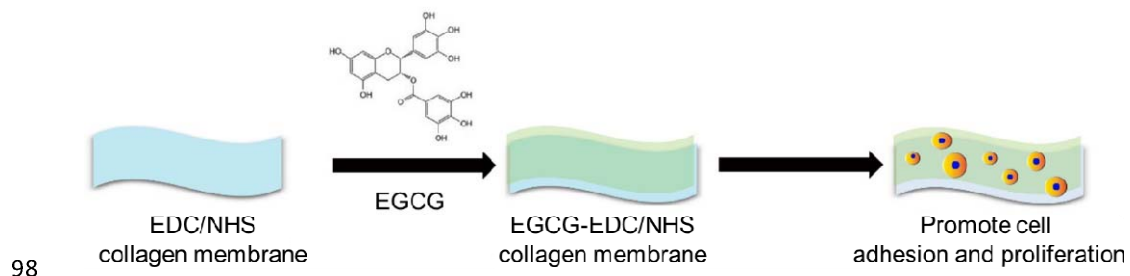

99 **Fig. 1.** Schematic graph of loading 0.064% EGCG to EDC/NHS collagen membrane

100 **2. Materials and Methods**

101 **2.1 Materials**

102 Commercially available EDC/NHS collagen membranes (Dentium) in size of  
103 10mm×20mm were purchased. EGCG was purchased from Jiang Xi Lv Kang Natural  
104 Products (Jiang Xi, China). All solvents and chemicals employed in the process were  
105 analytical grade and were used without further purification. The EGCG modified  
106 EDC/NHS collagen membrane was fabricated as follow: each EDC/NHS collagen  
107 membrane was immersed in 0.064% (w/v) EGCG solution at room temperature for 1  
108 hr. After that, the EGCG-EDC/NHS collagen membranes were rinsed three times in  
109 deionized water and freeze dried overnight. The pure EDC/NHS collagen membranes  
110 were also processed under the same protocol except for immersion.

111 **2.2 Surface morphology**

112 The morphologies of EDC/NHS collagen membranes and EGCG modified collagen  
113 membranes were characterized by Scanning electron microscope (SEM, S-800,  
114 HITACHI, Tokyo, Japan) with an accelerating voltage of 25 kV. The discs were  
115 coated with an ultrathin layer (300 Å) of Au/Pt in an ion sputter (E1010, HITACHI,  
116 Tokyo, Japan) to achieve enough electrical conductivity.

117 **2.3 Mechanical and chemical properties**

118 a. Mechanical properties measurement

119 To investigate the ultimate stress (US), ultimate elongation (UE) and Young's  
120 modulus (YM) of the membranes, each sample (10mm×20mm) was attached to an  
121 electronic universal testing machine (SHIMADZU, AG-IC 50 KN, Japan). Five  
122 samples were measured for each kind of membranes. Each sample was strained at a  
123 rate of 15mm/min at room temperature. When operating differential scanning  
124 calorimeter (DSC) measurement, samples in size of 10mm×20mm (~6.71 mg) were  
125 encapsulated in aluminum pan, then heated from 25 to 500 °C at a rate of 10 °C/min  
126 under nitrogen atmosphere. Thermo-grams were obtained by the Netzsch Proteus  
127 analysis software, and thermal denaturation was recorded as the typical peak.

128 b. Chemical properties measurement

129 A Fourier transform infrared spectroscopy (FTIR) spectrophotometer (Spectrum One,  
130 PerkinElmer, Inc., Waltham) was employed to measure the FTIR spectra of the  
131 samples, the spectra of which were obtained at room temperature at the average of 32  
132 scans in the range of 400 – 4000 cm<sup>-1</sup>.

133 **2.4 Cell viability**

134 The cell viability was examined using the mouse macrophage cell line Raw 264.7  
135 obtained from the American Type Culture Collection (Rockville, MD, USA). Staining  
136 of Cell Counting Kit-8 (CCK-8, Dojindo Laboratories, Kumamoto, Japan) and  
137 Calcein AM/Hoechst were both conducted, but for different time periods. For CCK-8,

138 membranes were processed into 10mm×10mm in the clean bench, then placed in  
139 48-well plates and seeded with Raw 264.7 cell at a density of  $10^4$ /well. 10% CCK-8  
140 solution would be added to each well. Cells were then co-cultured for 10, 20, 40, 60,  
141 120, 240, 360 min and 1 day, respectively, with RPMI (Gibco, Thermo, USA)  
142 supplemented with 10% FBS (Gibco, Thermo, USA). Then plates would be incubated  
143 at 37 °C for another 3.5 hr. After incubation, the OD value at 450 nm was measured to  
144 determine the cell viability through a micro-plate reader (Multiskan, Thermo, USA).  
145 As for staining of Calcein AM/Hoechst, cells were cultured for 5 days on the dishes  
146 then incubated with 1μM Calcein AM (diluted from a 1mM stock solution of CAM in  
147 dimethyl sulfoxide, Dojindo Laboratories, Kumamoto, Japan) and 100 μL RPMI for  
148 30 mins in the incubator. The dishes were then washed three times by 1×PBS and  
149 stained with 100μL Hoechst 33258 working fluid (diluted from a 1mL stock solution  
150 in distilled water, KeyGen, China) for 10 mins in the incubator. At last, washed the  
151 dish for three times by 1×PBS and analyzed with an Inverted Ti-E microscope  
152 (Nikon).

## 153 **2.5 Cell adhesion**

154 SEM images were taken to preliminary estimate cell adhesion after culturing on  
155 EDC/NHS-Col and 0.064% EGCG-EDC/NHS-Col for 10, 20, 40 and 480 min, with  
156 processed as mentioned in 2.2. The expressions of integrin beta 1, 2, 3 in Raw 264.7



157 cells after culturing on blank wells, EDC/NHS-Col and 0.064%  
158 EGCG-EDC/NHS-Col for 10 mins were further evaluated by RNA isolation, cDNA  
159 synthesis, and RT-qPCR. Cells cultured on different surfaces were collected after  
160 incubating with 0.05% trypsin-EDTA (Gibco, Thermo, USA) for 5 mins and  
161 homogenized in 1-ml Trizol Reagent (Tianjian, Beijing, China). Total RNA was  
162 reverse-transcribed using mRNA Selective PCR kit (TaKaRa Bio-Clontech). Mouse  
163 integrin beta 1, 2 and 3 cDNA were amplified by real-time PCR using the SYBR  
164 Green PCR kit (Thermo Scientific, Braunschweig, Germany). The primer sequences  
165 used for the real-time PCR were listed in **Table 1**.

## 166 **2.6 Surgical Procedures**

167 The protocol of the present experiment was approved by Institution Review Board of  
168 West China Hospital of Stomatology (No.WCHSIRB-D-2017-097). Male C57BL/6,  
169 6~7 weeks of age, were adaptively fed for 3 days after purchasing. After  
170 anaesthetization by chloral hydrate, the surgical area on the back was shaved and  
171 aseptically prepared. Three parallel sagittal incisions were made in the dorsal skin and  
172 subcutaneous pockets were prepared for membrane implantation. The two kinds of  
173 membranes were prepared beforehand into 3mm×3mm size in the clean bench.  
174 EDC/NHS collagen membranes and EGCG-EDC/NHS collagen membranes were  
175 implanted into the pockets respectively. The control group underwent a sham

176 procedure. Afterwards, all the incisions were sutured. These mice were kept in a  
177 professional experimental animal room and fed with a standard laboratory diet. After  
178 recovering for 0 (12hr), 1, and 3 days, they were sacrificed by cervical dislocation.  
179 The membranes and the skins covering the materials were harvested together (equal  
180 areas around the suture were harvested in the control groups) and immediately fixed  
181 with 4% paraformaldehyde (Solarbio, Beijing, China) for at least 24hr.

## 182 **2.7 H & E staining**

183 The fixed samples were sliced into 3- $\mu$ m thick sections after embedding in paraffin  
184 for the following H & E staining and immunofluorescence assay. For H & E staining,  
185 the sections were incubated at 65 $^{\circ}$  for 4hr for deparaffinization and processed as  
186 follow:

- 187 a. Dhydration with ethanol;
- 188 b. Stain with hematoxylin for 5 mins and differentiate in 1% hydrochloric acid  
189 alcohol for 2 s ;
- 190 c. Incubate in 0.2% ammonia water for 2 mins and stain with eosin for 1 min;
- 191 d. Gradual dehydration through 95% ethanol, then clear and mount the sections with  
192 neutral resin. The sections were observed with light microscopy (Olympus, Tokyo,  
193 Japan) and scanned with Digital Slide Scanning System (PRECICE, Beijing,  
194 China).

195 **2.8 Promotion of revascularization**

196 3 days after implantation, tissue was harvested and prepared as sections. Then,  
197 sections would be fixed with 2% paraformaldehyde PBS for 24 hours (pH=7.4) and  
198 later washed by PBS for 3 times, which followed by soaking in 1% bovine serum  
199 albumin (BSA) PBS that contained 1% Triton X-100 for 1 hour. Eventually, incubated  
200 the sections in 1% Tween 20 for 10 mins, and washed twice in PBS for 5 mins. The  
201 sections were then stained with nucleus marker Hoechst, endothelial cell marker  
202 CD31 and adventitial fibroblast marker  $\alpha$ -SMA to visualized specific components in  
203 the fluorescent images.

204 **2.9 Statistical Analysis**

205 Data are presented as mean + standard deviation. Statistical computation was  
206 performed in GraphPad Prism 5.0 (GraphPad Software, San Diego, CA, USA) and  
207 statistical significance was analyzed using analysis of variance followed by Tukey's  
208 multiple comparison tests. Semi-quantitative data of immunofluorescence staining  
209 and HE staining that did not follow a normal distribution were further analyzed with  
210 Mann-Whitney  $U$  test. Unless otherwise noted,  $p < 0.05$  was considered statistically  
211 significant.

212 **3. Results**

213 **3.1 Surface morphology**

214 As shown in representative SEM images (**Fig. 2**), the surface morphology of  
215 EDC/NHS collagen membranes exhibited a rough, disordered outlook, with fibers  
216 randomly distributed. After treating with 0.064% EGCG, there were no notable  
217 changes on the outlooks, while the arrangement of fibers appeared more ordered and  
218 intact. In addition, we also found that smaller fiber branches extend from the  
219 backbone when compared with those without EGCG treatment. These might be due to  
220 the loading of EGCG hydrogen bonds formation between EGCG molecules and  
221 collagen fibers.

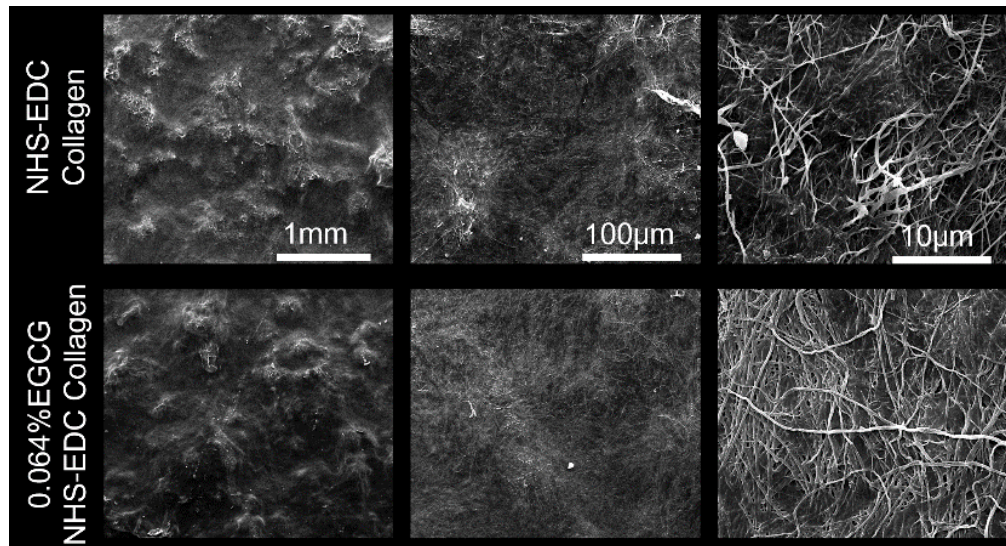

222  
223 **Fig. 2.** SEM images of EDC/NHS collagen membrane and 0.064% EGCG loaded  
224 EDC/NHS collagen membrane.

### 225 **3.2 Mechanical and chemical properties**

226 To examine the strength, stiffness and elasticity of the membranes, measurement of  
227 US, UE and YM were carried out and the corresponding volumes were written in  
228 **Table 2.** As US seemed relatively constant between the control and EGCG group,

229 both UE and YM showed different trends. The modification of 0.064% EGCG  
230 strengthened the UE volume of collagen membranes, whereas weakened the YM  
231 volume (**Fig. 3a**). Also, there were no statistical difference between membranes with  
232 or without EGCG modification in result of DSC measurement (**Fig. 3b**). From results  
233 of FTIR spectra and DSC measurement, it could be concluded that chemical  
234 properties remain consistent before and after the treatment of 0.064% EGCG. The  
235 FTIR spectra indicated that no structure changes had happened to collagen fibers  
236 since the absorption peaked at  $1235\text{ cm}^{-1}$  (tertiary structure) and  $1450\text{ cm}^{-1}$   
237 (pyrrolidine ring vibrations) of EDC/NHS collagen membrane, and 0.064%  
238 EGCG-EDC/NHS collagen membrane remained constant. Also, the ratio of  $1235$   
239  $\text{cm}^{-1}/1450\text{ cm}^{-1}$  (**Table 3**) came out to be around 1.00, illustrating that the secondary  
240 structure of collagen triple helix remained its integrity in both membranes, which  
241 assured the great biological performance of collagen membranes (Figueiró, Góes,  
242 Moreira, & Sombra, 2004).Therefore, it could be inferred that EGCG did not affect  
243 the physicochemical property of collagen.

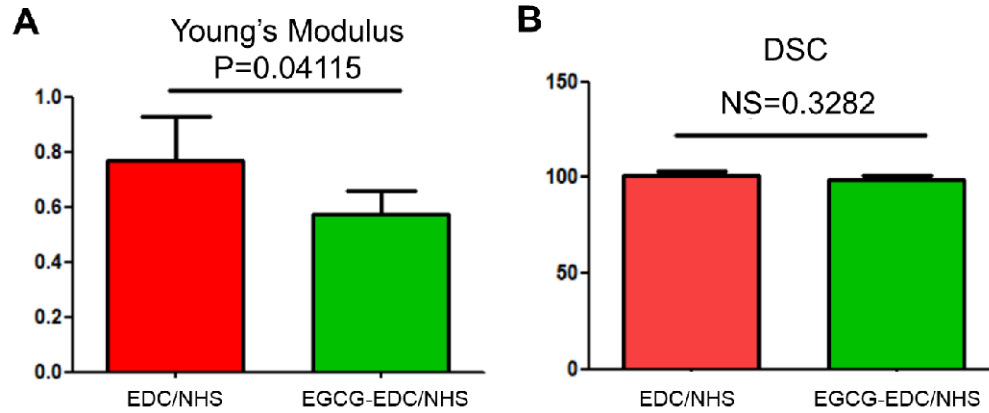

244

245 **Fig. 3.** Young's Modulus (a) and DSC statistics (b) of EDC/NHS collagen membrane  
246 and 0.064% EGCG-EDC/NHS collagen membrane. NS= no significance.

247

### 3.3 Cell Viability

248

The results of CCK-8 staining showed the cell viability of raw 264.7 cells under pure

249

medium, 0.064% EGCG supplemented medium, EDC/NHS collagen membrane and

250

0.064% EGCG-EDC/NHS collagen membrane (**Fig. 4a**) from the first few minutes to

251

1 day. In the first hour, there was no significance between the groups. The

252

improvement of cell viability by EGCG was raised after culturing for 2 hr and the

253

following time points. In order to understand the effect of EGCG on cell viability

254

after culturing for longer time period, Calcein AM/Hoechst staining was conducted on

255

day 5 (**Fig. 4b**). The test results also showed the same trend with more live cells on

256

EGCG-EDC/NHS-Col comparing with EDC/NHS-Col, indicating that the addition of

257

EGCG was conducive to the performance of cell activities.

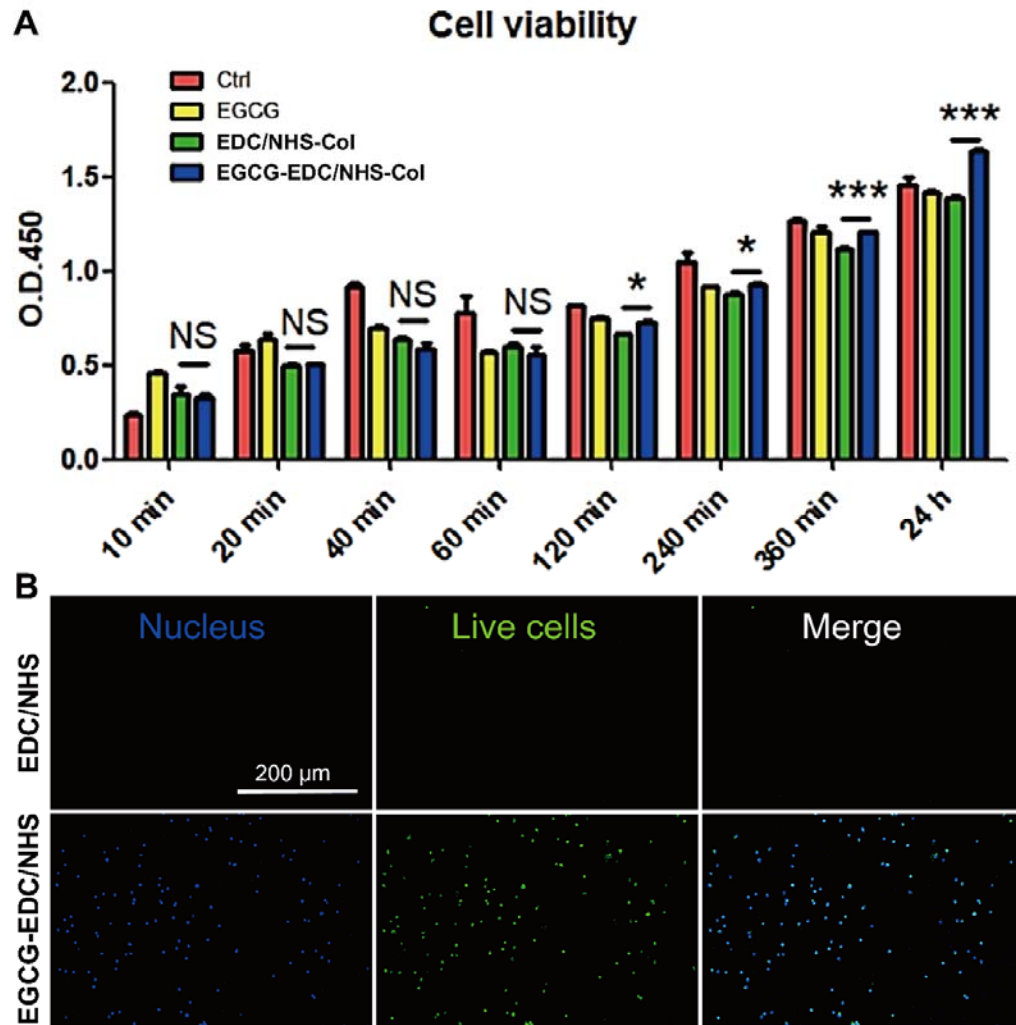

258

259 **Fig. 4.** CCK-8 results (a) and Calcein AM/Hoechst staining (b) of Raw 264.7 cultured  
260 on different condition. Ctrl, standard medium; EGCG, 0.064% EGCG supplemented  
261 medium; EDC/NHS-Col, EDC/NHS collagen membrane; EGCG-EDC/NHS-Col,  
262 0.064% EGCG-EDC/NHS collagen membrane. Green, live cells; blue, nucleus. NS=  
263 no significance, \* $P < 0.05$ , \*\* $P < 0.01$ , \*\*\* $P < 0.001$ , one-way ANOVA with Tukey's  
264 multiple comparison test,  $n = 3$  in each group.

### 265 3.4 Cell adhesion

266 To observe cell adhesion towards the membrane, SEM was used to generate the  
267 morphology of Raw 264.7 cells cultured on membranes in 8 hr (**Fig. 5a&b**). It  
268 elucidated that with the modification of EGCG, not only more cells adhered to the

269 surface but also a better spreading condition of cells was detected. Also, more  
270 protrusions could be seen to seize the fibers even at very early incubation, compared  
271 to that without EGCG. Considering integrins, the transmembrane molecules, with  
272 large extracellular domains that are known to play a key role in adhesion between  
273 cells and ECM (Changede & Sheetz, 2017; Tseng et al., 2018), expression levels of  
274 integrin beta 1, 2 and 3 in Raw 264.7 cells were measured. The result showed that  
275 there existed a boost of integrin beta 2 in the EGCG- EDC/NHS group, whereas no  
276 differences appeared in the expression of integrin beta 1 and 3 with the treatment of  
277 0.064% EGCG (**Fig. 5c**). These results suggested that 0.064% EGCG could enhance  
278 the adhesion properties of EDC/NHS collagen membrane at early phases.



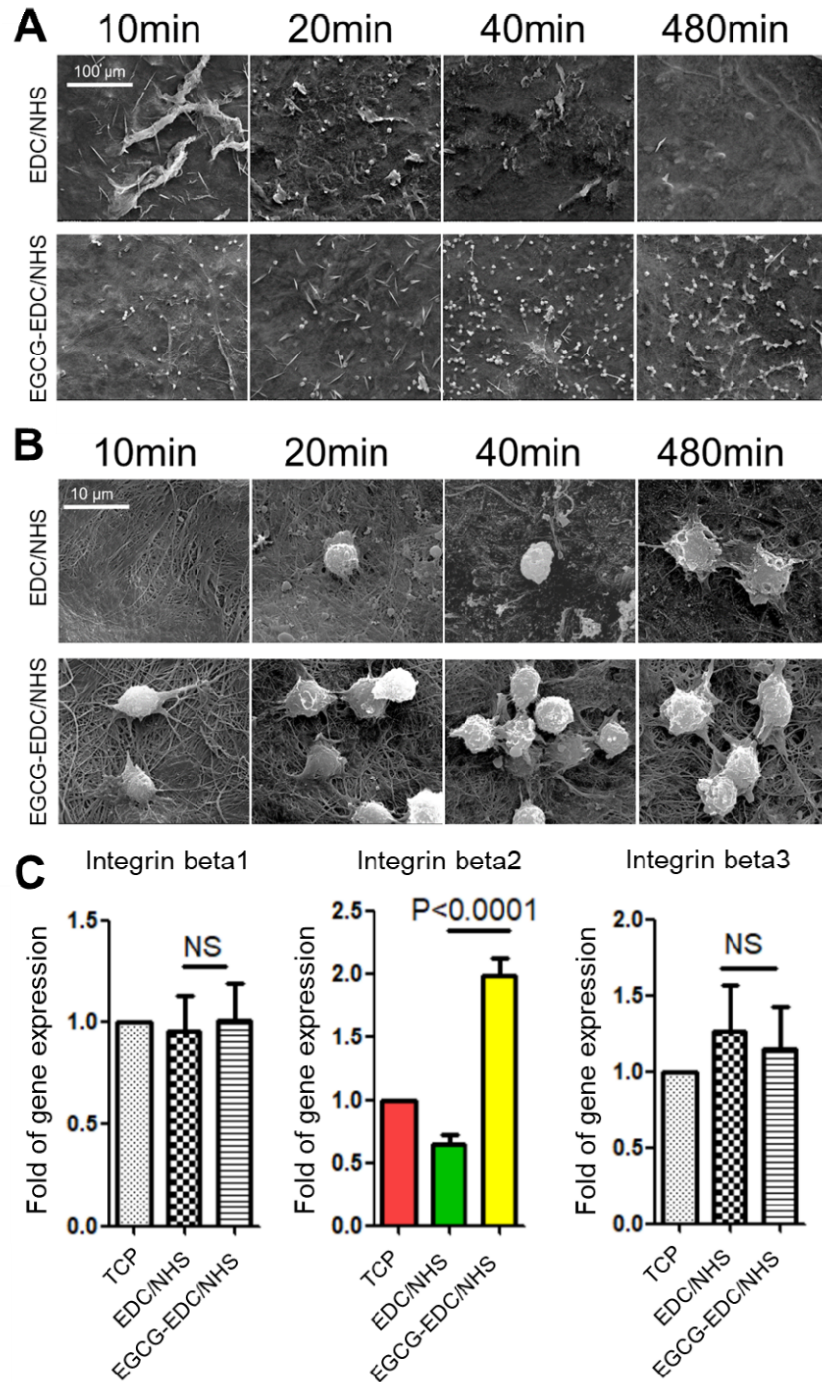

279

280 **Fig. 5.** SEM images of Raw 264.7 cells cultured on EDC/NHS and EGCG treated  
281 EDC/NHS collagen membranes under low (a) and high (b) magnification, and the  
282 expression levels of integrin beta 1, 2 and 3, after culturing on tissue culture plate  
283 (TCP), EDC/NHS-Col and EGCG-EDC/NHS-Col for 10 mins (c), respectively. NS=  
284 no significance.

285 **3.5 Promotion of revascularization**

286 We identified the ability of 0.064% EGCG EDC/NHS-Col to promote  
287 revascularization by immunofluorescence staining of nuclei, vascular endothelial cell  
288 marker CD31 and adventitial fibroblast marker  $\alpha$ -SMA (Manetti et al., 2017). As  
289 shown in **Fig. 6a**, more blood vessels were generated in EGCG-EDC/NHS-Col  
290 compared to EDC/NHS-Col, meanwhile, as shown in **Fig. 6d**, the results of  
291 semi-quantitative analysis of total blood vessel area showed that it was larger in 0.064%  
292 EGCG EDC/NHS-Col than that in the EDC/NHS-Col ( $p < 0.01$ ).

### 293 **3.6 Recruitment of monocyte/macrophage**

294 12 hours after the implantation, there were no visible cells recruited at surgical sites,  
295 but with another 12 hours, we could see that around the membrane, a certain number  
296 of immune cells were gathered, which was similar on 3-days post implantation (**Fig.**  
297 **6c&d**). In addition, semi-quantitative cell counting revealed that in 1- and 3-days post  
298 surgeries, 0.064% EGCG-EDC/NHS-Col recruited more monocytes/macrophages,  
299 while EDC/NHS-Col was about one-third of the number of the experimental group  
300 (**Fig. 6e**).

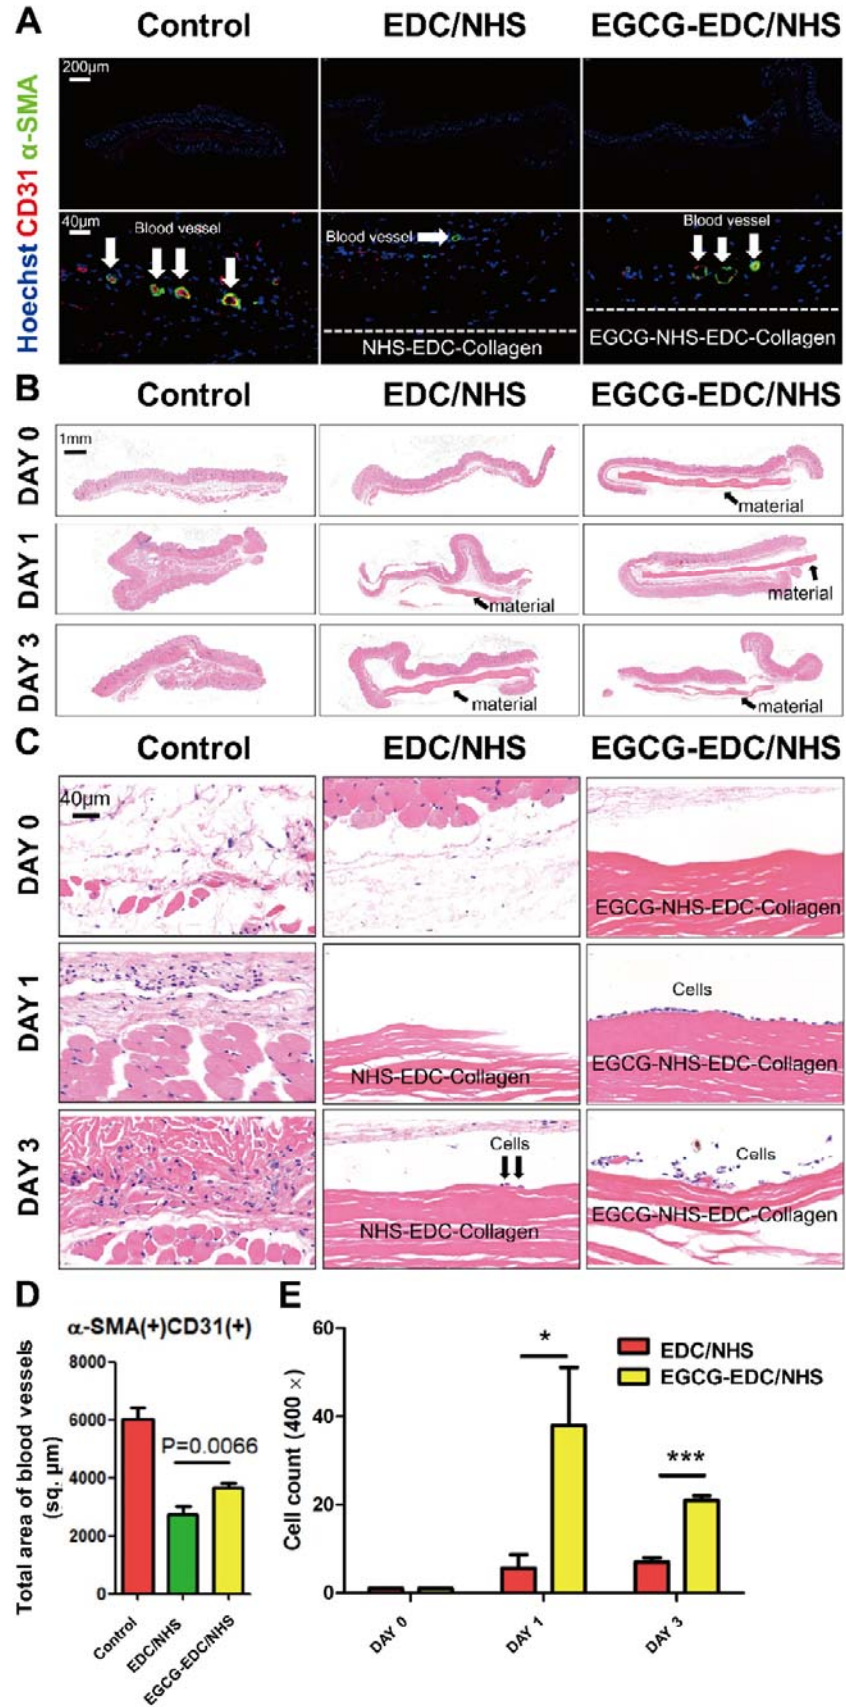

302 **Fig. 6.** Results of subcutaneous implantation. Immunofluorescence staining of  $\alpha$ SMA  
303 (green), CD31 (red) and Hoechst (blue) in subcutaneous implantation samples of  
304 EDC/NHS-Col and EGCG-EDC/NHS-Col, control group refers to normal skin (a);  
305 semi-quantitative analysis of total blood vessel area was calculated in each group (d).  
306 Recruitment of monocyte/macrophage after subcutaneous implantation of EDC/NHS  
307 collagen membrane and EGCG-EDC/NHS collagen membrane, control group  
308 underwent a sham procedure. HE staining of subcutaneous tissue (b&c) and cell  
309 counting of monocyte/macrophage (e) in NHS/EDC-Col and EGCG-EDC/NHS-Col  
310 were conducted on day 0, 1, and 3 post implantations. Arrows indicate material (b)  
311 and monocyte/macrophage (c). Statistical significance was analyzed using analysis of  
312 variance followed by Tukey's multiple comparison tests and Mann-Whitney *U* test (*n*  
313 = 5). Data are presented as mean + standard deviation. \**P*<0.05, \*\*\**P*<0.001.

#### 314 **4. Discussion**

315 To reconstruct alveolar bone deficiency, the application of biomaterials and certain  
316 surgery are on account of its morphology and the severity of horizontal/ vertical bone  
317 loss. When performing GBR, bone defect less than 6 mm is a prerequisite for  
318 desirable outcome, whereas the complex case that is combined with vertical and  
319 horizontal bone defect  $\leq$  4mm, it is recommended to use crosslinked absorbable  
320 membrane or non-absorbable membrane with bone filler to create appropriate repair  
321 conditions (Tolstunov, Hamrick, Broumand, Shilo, & Rachmiel, 2019). In addition,  
322 crosslinked membranes are more osteoinductive, with more bone marrow-multipotent  
323 stromal cells attachment to the crosslinked membranes, better ALP activity, and  
324 calcium deposition were observed compared with the non-crosslinked one (El-Jawhari,  
325 Moisley, Jones, & Giannoudis, 2019). According to previous studies, the use of EDC  
326 as crosslinker could not only prolong the integrity of the membrane, but also avoid

327 severe FBR, lack of vascularization in the early stage of healing and poor integration,  
328 which are the fatal flaws of traditional cross-linking agents (Park et al., 2015). The  
329 addition of NHS would improve EDC-mediated crosslinking, stabilize active  
330 intermediates, and reduce side products for subsequent reactions (Grabarek & Gergely,  
331 1990). However, the present EDC/NHS crosslinked collagen membrane lacks the  
332 ability to regulate immune responses and induce osteoblast-related cell behavior.  
333 Regarding cell behavior, EGCG has shown the ability to complement these two  
334 aspects in our previous research as mentioned in the introduction. Thus, we attempted  
335 to modify to EDC/NHS crosslinked collagen membrane with 0.064% EGCG. After  
336 characterizing the material, results show that the backbone of collagen remains intact  
337 and the strength of membranes is barely altered, whereas the stiffness is moderately  
338 enhanced, though elasticity is slightly weakened. These not only ensure that the  
339 membrane will not be too supple to tightly cover the substitutes, supporting bone  
340 formation, but also verify that the chemical structure related to the biological activity  
341 of collagen has not been destroyed, though the definite clinical effect needs  
342 verification. Over the past decade, the ability of biomaterials to promote tissue  
343 regeneration by regulating immune cells in advance has been confirmed, the  
344 composition, physical and chemical properties, and surface morphology of which are  
345 the critical factors that affect the foreign body reaction (FBR) after implantation. As

346 one of the dominant immune cells in the FBR, macrophages can acutely polarize into  
347 different phenotypes according to the microenvironment created by the implant and  
348 direct the accumulated cells' behaviors that strongly involve in tissue reconstruction  
349 (Chu, Deng, Sun, Qu, & Man, 2017; Xie et al., 2020). The arrangement and diameter  
350 of the fibers can significantly affect the behavior of macrophages. Anisotropic  
351 membranes with thicker fibers have an increased tendency to oxidative degradation,  
352 compared with the thinner and isotropic one (Wissing et al., 2019), more macrophages  
353 adherence on the align compared with the random and the smaller fibers also have  
354 been proved with better biocompatibility as thinner fibrous capsule and abundant  
355 volume of blood vessel formation (Saino et al., 2011). In this article, we found that the  
356 surface morphology of EGCG-EDC/NHS-Col has been altered with smaller fiber  
357 branches extended from the backbone and the arrangement became more coherent,  
358 which may account for the cell viability and adherence. Under the electron  
359 microscope, the viability of RAW 264.7 on EGCG-EDC/NHS-Col is significantly  
360 higher than any other groups at all detection points during 2-24 hours after  
361 implantation. Not only did more macrophages adhere to membrane with the treatment  
362 of EGCG, but the adhered macrophages were activated at an early stage (20min) with  
363 many protrusions, and which is also confirmed by PCR detection. Also, more  
364 monocyte/macrophage recruitment could be seen on EGCG-EDC/NHS-Col in the *in*

365 *vivo* subcutaneous implantation. As researchers have found that the onset of  
366 neovascularization greatly depends on macrophage and its coherent phenotypic switch  
367 (Spiller et al., 2014; Spiller, Freytes, & Vunjak-Novakovic, 2015), we hypothesize the  
368 promising angiogenesis is result from the recruitment of macrophages which cannot  
369 be excluded considering the microstructure of EGCG-EDC/NHS-Col. Of note, in our  
370 previous study, the modification of EGCG was highly competent at promoting  
371 vascularization that involved the secretion of M2-related chemokines (Chu et al.,  
372 2018). The formation of blood vessel could offer nutrient, stem cells and oxygen  
373 supply and waste discharge, vastly improving the regenerative response. Therefore,  
374 our efforts are directed at macrophages and the outcome of vascularization as primary  
375 study towards the developed EGCG modified EDC/NHS collagen membrane. And  
376 our results showed that the modification of EGCG is beneficial for cell viability,  
377 adhesion and vessel formation in both *in vitro* RAW 264.7 culture experiment and in  
378 *vivo* subcutaneous implantation. The great biocompatibility of EGCG modified  
379 EDC/NHS collagen guided bone regeneration membrane is stated without  
380 compromising the advantages of collagen itself. Furthermore, our results  
381 demonstrated the modified membranes could significantly affect the attachment of  
382 macrophages and enhance its viability both *in vivo* and *in vitro*, which might be  
383 related to the formation of vessels. However, the phenotypes of macrophages and

384 mechanisms of angiogenesis need further investigation. In short, we develop a  
385 biomaterial that can promote the early recruitment of macrophages and the formation  
386 of blood vessels, possessing great potential for bone regeneration in the field of  
387 implant dentistry.

## 388 **5. Conclusion**

389 In conclusion, with the modification of EGCG, EDC/NHS collagen guided bone  
390 regeneration membrane can better promote cell adhesion and improve cell viability,  
391 which is confirmed in our experiments that living cells attach to it and the expression  
392 of adhesion-related integrin is indeed increased. In addition, there was a statistically  
393 significant difference in angiogenesis after membrane implantation. The benefits  
394 mentioned above do not exclude the presence of smaller collagen fibers, but this  
395 different microstructure does not damage the chemical structure of the collagen itself,  
396 though the specific effect needs further exploration.

## 397 **Funding information**

398 This work was supported by Research and Develop Program, West China Hospital of  
399 Stomatology Sichuan University (No.LCYJ2019-19); the Fundamental Research  
400 Funds for the Central Universities (No. 2082604401239)

## 401 **Statement of conflict of interest**

402 There are no conflicts of interest related to this manuscript.





404 **Table 1. Nucleotide primers used for quantitative polymerase chain reaction.**

| <b>Genes</b> | <b>Oligonucleotide sequence</b> |
|--------------|---------------------------------|
| Integrin b1  | Forward: CCAAGTGGGACACGGGTGA    |
|              | Reverse: CTGCTGCTGTGAGCTTGGTG   |
| Integrin b2  | Forward: GCAGCAGAAGGACGGAAACG   |
|              | Reverse: AGGGGGTTGTCGTTGTTCCA   |
| Integrin b3  | Forward: AGACAGCGCCCAGATCACTC   |
|              | Reverse: GCCAATCCGAAGGTTGCTGG   |

405

406

407 **Table 2. Mechanical properties of membranes.**

| Groups           | Ultimate Stress<br>(MPa) | Ultimate<br>elongation (%) | Young's<br>modulus |
|------------------|--------------------------|----------------------------|--------------------|
| EDC/NHS-Col      | 18.32±3.12               | 22.44±3.12                 | 0.77±0.16          |
| EGCG-EDC/NHS-Col | 18.18±2.97               | 29.29±2.78                 | 0.57±0.09          |

408

409

410 **Table 3. FTIR ratio at the bands of 1235 cm<sup>-1</sup> and 1450 cm<sup>-1</sup>**

| Groups           | 1235/1450   |
|------------------|-------------|
| NHS/EDC-Col      | 1.001±0.002 |
| EGCG-NHS/EDC-Col | 0.989±0.003 |

411

412 **Reference**

- 413 Akhshabi, S., Biazar, E., Singh, V., Keshel, S. H., & Geetha, N. (2018). The effect of the carbodiimide  
414 cross-linker on the structural and biocompatibility properties of collagen-chondroitin sulfate  
415 electrospun mat. *International journal of nanomedicine*, *13*, 4405-4416.
- 416 Bax, D. V., Davidenko, N., Gullberg, D., Hamaia, S. W., Farndale, R. W., Best, S. M., & Cameron, R. E.  
417 (2017). Fundamental insight into the effect of carbodiimide crosslinking on cellular  
418 recognition of collagen-based scaffolds. *Acta biomaterialia*, *49*, 218-234.
- 419 Changede, R., & Sheetz, M. (2017). Integrin and cadherin clusters: A robust way to organize adhesions  
420 for cell mechanics. *BioEssays : news and reviews in molecular, cellular and developmental*  
421 *biology*, *39*(1), 1-12.
- 422 Chu, C., Deng, J., Sun, X., Qu, Y., & Man, Y. (2017). Collagen Membrane and Immune Response in  
423 Guided Bone Regeneration: Recent Progress and Perspectives. *Tissue engineering. Part B,*  
424 *Reviews*, *23*(5), 421-435.
- 425 Chu, C., Deng, J., Xiang, L., Wu, Y., Wei, X., Qu, Y., & Man, Y. (2016). Evaluation of  
426 epigallocatechin-3-gallate (EGCG) cross-linked collagen membranes and concerns on  
427 osteoblasts. *Materials science & engineering. C, Materials for biological applications*, *67*,  
428 386-394.
- 429 Chu, C., Liu, L., Rung, S., Wang, Y., Ma, Y., Hu, C., . . . Qu, Y. (2020). Modulation of foreign body  
430 reaction and macrophage phenotypes concerning microenvironment. *Journal of biomedical*  
431 *materials research. Part A*, *108*(1), 127-135.
- 432 Chu, C., Liu, L., Wang, Y., Wei, S., Wang, Y., Man, Y., & Qu, Y. (2018). Macrophage phenotype in the  
433 epigallocatechin-3-gallate (EGCG)-modified collagen determines foreign body reaction.  
434 *Journal of Tissue Engineering and Regenerative Medicine*, *12*(6), 1499-1507.
- 435 Chu, C., Wang, Y., Wang, Y., Yang, R., Liu, L., Rung, S., . . . Qu, Y. (2019). Evaluation of  
436 epigallocatechin-3-gallate (EGCG) modified collagen in guided bone regeneration (GBR)  
437 surgery and modulation of macrophage phenotype. *Materials science & engineering. C,*  
438 *Materials for biological applications*, *99*, 73-82.
- 439 El-Jawhari, J. J., Jones, E., & Giannoudis, P. V. (2016). The roles of immune cells in bone healing;  
440 what we know, do not know and future perspectives. *Injury-international Journal of the Care*  
441 *of the Injured*, *47*(11), 2399-2406.
- 442 El-Jawhari, J. J., Moisley, K., Jones, E., & Giannoudis, P. V. (2019). A crosslinked collagen membrane  
443 versus a non-crosslinked bilayer collagen membrane for supporting osteogenic functions of  
444 human bone marrow-multipotent stromal cells. *European cells & materials*, *37*, 292-309.
- 445 Eskan, M. A., Girouard, M. E., Morton, D., & Greenwell, H. (2017). The effect of membrane exposure  
446 on lateral ridge augmentation: a case-controlled study. *International journal of implant*  
447 *dentistry*, *3*(1), 26.
- 448 Figueiró, S. D., Góes, J. C., Moreira, R. A., & Sombra, A. S. B. (2004). On the physico-chemical and  
449 dielectric properties of glutaraldehyde crosslinked galactomannan–collagen films.

- 450                    *Carbohydrate Polymers*, 56(3), 313-320.
- 451 Grabarek, Z., & Gergely, J. (1990). Zero-length crosslinking procedure with the use of active esters.
- 452                    *Analytical biochemistry*, 185(1), 131-135.
- 453 Honda, Y., Takeda, Y., Li, P., Huang, A., Sasayama, S., Hara, E., . . . Tanaka, T. (2018).
- 454 Epigallocatechin Gallate-Modified Gelatin Sponges Treated by Vacuum Heating as a Novel
- 455 Scaffold for Bone Tissue Engineering. *Molecules*, 23(4), 876.
- 456 Kurashima, Y., & Kiyono, H. (2017). Mucosal Ecological Network of Epithelium and Immune Cells
- 457 for Gut Homeostasis and Tissue Healing. *Annual review of immunology*, 35, 119-147.
- 458 Lagha, A. B., & Grenier, D. (2019). Tea polyphenols protect gingival keratinocytes against
- 459 TNF- $\alpha$ -induced tight junction barrier dysfunction and attenuate the inflammatory response of
- 460 monocytes/macrophages. *Cytokine*, 115, 64-75.
- 461 Liao, S., Tang, Y., Chu, C., Lu, W., Baligen, B., Man, Y., & Qu, Y. (2020). Application of green tea
- 462 extracts epigallocatechin-3-gallate in dental materials: Recent progress and perspectives.
- 463 *Journal of biomedical materials research. Part A*.
- 464 Lin, S. Y., Kang, L., Wang, C. Z., Huang, H. H., Cheng, T. L., Huang, H. T., . . . Chen, C. H. (2018).
- 465 (-)-Epigallocatechin-3-Gallate (EGCG) Enhances Osteogenic Differentiation of Human Bone
- 466 Marrow Mesenchymal Stem Cells. *Molecules*, 23(12), 3221.
- 467 Manetti, M., Romano, E., Rosa, I., Guiducci, S., Bellando-Randone, S., De Paulis, A., . . .
- 468 Matucci-Cerinic, M. (2017). Endothelial-to-mesenchymal transition contributes to endothelial
- 469 dysfunction and dermal fibrosis in systemic sclerosis. *Annals of the rheumatic diseases*, 76(5),
- 470 924-934.
- 471 Melcher, A. H. (1976). On the repair potential of periodontal tissues. *Journal of periodontology*, 47(5),
- 472 256-260.
- 473 Meyer, M. (2019). Processing of collagen based biomaterials and the resulting materials properties.
- 474 *Biomedical engineering online*, 18(1), 24.
- 475 Park, J. Y., Jung, I. H., Kim, Y. K., Lim, H. C., Lee, J. S., Jung, U. W., & Choi, S. H. (2015). Guided
- 476 bone regeneration using 1-ethyl-3-(3-dimethylaminopropyl) carbodiimide (EDC)-cross-linked
- 477 type-I collagen membrane with biphasic calcium phosphate at rabbit calvarial defects.
- 478 *Biomaterials research*, 19, 15.
- 479 Saino, E., Focarete, M. L., Gualandi, C., Emanuele, E., Cornaglia, A. I., Imbriani, M., & Visai, L.
- 480 (2011). Effect of electrospun fiber diameter and alignment on macrophage activation and
- 481 secretion of proinflammatory cytokines and chemokines. *Biomacromolecules*, 12(5),
- 482 1900-1911.
- 483 Spiller, K. L., Anfang, R. R., Spiller, K. J., Ng, J., Nakazawa, K. R., Daulton, J. W., &
- 484 Vunjak-Novakovic, G. (2014). The role of macrophage phenotype in vascularization of tissue
- 485 engineering scaffolds. *Biomaterials*, 35(15), 4477-4488.
- 486 Spiller, K. L., Freytes, D. O., & Vunjak-Novakovic, G. (2015). Macrophages modulate engineered
- 487 human tissues for enhanced vascularization and healing. *Annals of biomedical engineering*,

- 488                   43(3), 616-627.
- 489 Tolstunov, L., Hamrick, J. F. E., Broumand, V., Shilo, D., & Rachmiel, A. (2019). Bone Augmentation  
490                   Techniques for Horizontal and Vertical Alveolar Ridge Deficiency in Oral Implantology. *Oral*  
491                   *and maxillofacial surgery clinics of North America*, 31(2), 163-191.
- 492 Tseng, H. Y., Samarelli, A. V., Kammerer, P., Scholze, S., Ziegler, T., Immler, R., . . . Böttcher, R. T.  
493                   (2018). LCP1 preferentially binds clasped  $\alpha$ M $\beta$ 2 integrin and attenuates leukocyte adhesion  
494                   under flow. *Journal of cell science*, 131(22), jcs218214.
- 495 Wang, L., Yang, G., Yuan, L., Yang, Y., & Zhao, H. (2018). Green Tea Catechins Effectively Altered  
496                   Hepatic Fibrogenesis in Rats by Inhibiting ERK and Smad1/2 Phosphorylation. *Journal of*  
497                   *agricultural and food chemistry*, 67(19), 5437-5445
- 498 Wessing, B., Lettner, S., & Zechner, W. (2018). Guided Bone Regeneration with Collagen Membranes  
499                   and Particulate Graft Materials: A Systematic Review and Meta-Analysis. *The International*  
500                   *journal of oral & maxillofacial implants*, 33(1), 87–100.
- 501 Wissing, T. B., Bonito, V., van Haaften, E. E., van Doeselaar, M., Brugmans, M., Janssen, H. M., . . .  
502                   Smits, A. (2019). Macrophage-Driven Biomaterial Degradation Depends on Scaffold  
503                   Microarchitecture. *Frontiers in bioengineering and biotechnology*, 7, 87.
- 504 Wu, Y. R., Choi, H. J., Kang, Y. G., Kim, J. K., & Shin, J. W. (2017). In vitro study on  
505                   anti-inflammatory effects of epigallocatechin-3-gallate-loaded nano- and microscale particles.  
506                   *International journal of nanomedicine*, 12, 7007-7013.
- 507 Xie, Y., Hu, C., Feng, Y., Li, D., Ai, T., Huang, Y., . . . Tan, J. (2020). Osteoimmunomodulatory effects  
508                   of biomaterial modification strategies on macrophage polarization and bone regeneration.  
509                   *Regenerative biomaterials*, 7(3), 233-245.
